# Supplementary material for: Performance of Large Language Models on a Neurology Board–Style Examination
Source: PubMed Central journal article supplement (PMC10704278; doi:10.1001/jamanetworkopen.2023.46721), 2023-12-07
Supplement: jamanetwopen-e2346721-s002.pdf [file jamanetwopen-e2346721-s002.pdf]

## Data Sharing Statement

Schubert. Performance of Large Language Models on a Neurology Board–Style Examination. *JAMA Netw Open*. Published December 07, 2023. doi:10.1001/jamanetworkopen.2023.46721

### Data

**Data available:** Yes

**Data types:** Data (not involving human participants)

**How to access data:** [https://github.com/venkataramani-lab/NeurologyBoard\\_LLM](https://github.com/venkataramani-lab/NeurologyBoard_LLM)

**When available:** With publication

### Supporting Documents

**Document types:** Statistical/analytic code

**How to access documents:** [https://github.com/venkataramani-lab/NeurologyBoard\\_LLM](https://github.com/venkataramani-lab/NeurologyBoard_LLM)

**When available:** With publication

### Additional Information

**Who can access the data:** Publicly available data.

**Types of analyses:** For every purpose.

**Mechanisms of data availability:** Publicly available without investigator support.
